# Supplementary material
Source: Springer Nature journal article supplement (https://www.springermedizin.de/resource/supplementary/13063_2012_1249_MOESM4_ESM.pdf/9620466)

**Mayors**

**Traders**

-% procured from small holders

Small holder farmers

**Substitution**

“How much of the demand is additional on the market?”  
household food consumption

**Risk**

-investments in production technology  
-specialisation

**Agricultural output**

-Profits= Price \* Quantity - Costs

**Household income**

-distribution/welfare effects

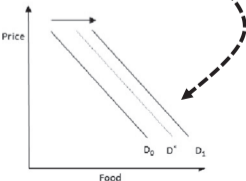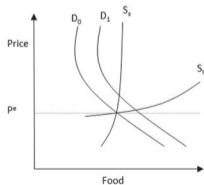

Supplement: MOESM4 [file 9620466]
